# Supplementary material
Source: Springer Nature journal article supplement (https://www.springermedizin.de/resource/supplementary/13069_2009_17_MOESM4_ESM.pdf/9659640)

**a.**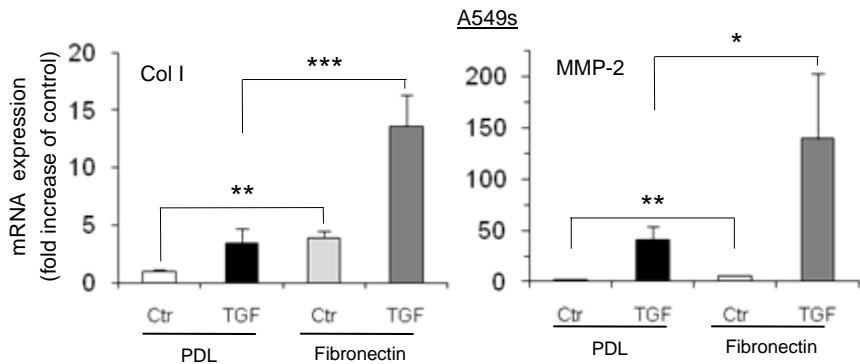**b.**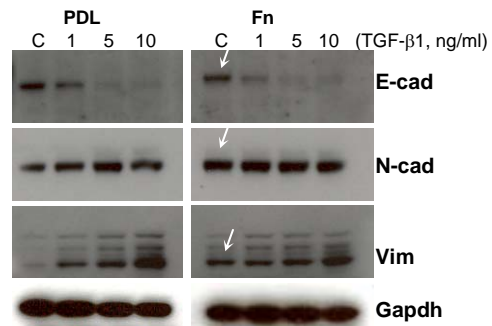**c.**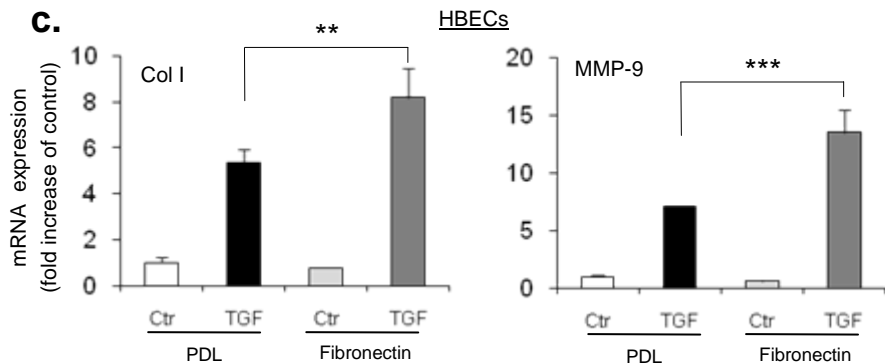**d.**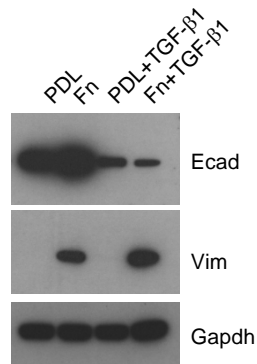

Supplement: MOESM4 [file 9659640]
